# Supplementary material
Source: PubMed Central journal article supplement (PMC10408256)
Supplement: jama-e2223631-s001.pdf [file jama-e2223631-s001.pdf]

## Supplemental Online Content

Harle CA, Wu W, Vest JR. Accuracy of electronic health record food insecurity, housing instability, and financial strain screening in adult primary care. *JAMA*. Published February 7, 2023. doi:10.1001/jama.2022.23631

**eTable.** Questionnaire Items

**eReferences**

This supplemental material has been provided by the authors to give readers additional information about their work.

eTable. Questionnaire Items

| <b>Food Insecurity</b>                                                                                                                                                                                                                                                                                                                                                                                                                                                                                                      |                                                                                                                                                                                                                                                                                                                                                                                                                                                                                                                                                                                                                                                                                                                                                                                                                                                                                               |
|-----------------------------------------------------------------------------------------------------------------------------------------------------------------------------------------------------------------------------------------------------------------------------------------------------------------------------------------------------------------------------------------------------------------------------------------------------------------------------------------------------------------------------|-----------------------------------------------------------------------------------------------------------------------------------------------------------------------------------------------------------------------------------------------------------------------------------------------------------------------------------------------------------------------------------------------------------------------------------------------------------------------------------------------------------------------------------------------------------------------------------------------------------------------------------------------------------------------------------------------------------------------------------------------------------------------------------------------------------------------------------------------------------------------------------------------|
| EHR questions from <sup>1</sup>                                                                                                                                                                                                                                                                                                                                                                                                                                                                                             | US Department of Agriculture’s Six-Item Short Form of the Food Security Survey <sup>2</sup>                                                                                                                                                                                                                                                                                                                                                                                                                                                                                                                                                                                                                                                                                                                                                                                                   |
| <p>1. Within the past 12 months, have you worried that your food would run out before you got money to buy more?</p> <p>2. Within the past 12 months, the food you bought just didn't last and you didn't have money to get more?</p> <p>Scoring</p> <ul style="list-style-type: none"> <li>Any positive screen (sometimes or often true) is positive.</li> <li>Negative responses to both the above questions equals negative.</li> </ul>                                                                                  | <p>1. Within the past 12 months, have you worried that your food would run out before you got money to buy more?</p> <p>2. Within the past 12 months, the food you bought just didn't last and you didn't have money to get more?</p> <p>3. How often in the past 12 months could you not afford to eat balanced meals?</p> <p>4. In the last 12 months, did you or other adults in your household ever cut the size of your meals or skip meals because there wasn't enough money for food?</p> <p>5. In the last 12 months, did you ever eat less than you felt you should because there wasn't enough money for food?</p> <p>6. In the last 12 months, were you ever hungry but didn't eat because there wasn't enough money for food?</p> <p>Scoring</p> <ul style="list-style-type: none"> <li>Sum responses into a single scale.</li> <li>Score of 2 or greater is positive.</li> </ul> |
| <b>Housing instability</b>                                                                                                                                                                                                                                                                                                                                                                                                                                                                                                  |                                                                                                                                                                                                                                                                                                                                                                                                                                                                                                                                                                                                                                                                                                                                                                                                                                                                                               |
| EHR questions from <sup>3</sup>                                                                                                                                                                                                                                                                                                                                                                                                                                                                                             | Housing Instability Index <sup>4</sup>                                                                                                                                                                                                                                                                                                                                                                                                                                                                                                                                                                                                                                                                                                                                                                                                                                                        |
| <p>1. In the last 12 months, was there a time when you were not able to pay the mortgage or rent on time?</p> <p>2. In the last 12 months, how many places have you lived?</p> <p>3. In the last 12 months, was there a time when you did not have a steady place to sleep or slept in a shelter (including</p> <p>4. now)?</p> <p>Scoring</p> <ul style="list-style-type: none"> <li>Any positive response to the above is positive.</li> <li>Negative responses to all of the above questions equals negative.</li> </ul> | <p>1. In the past 12 months, have you had to live somewhere that you did not want to live?</p> <p>2. Have you had trouble getting housing in the past 12 months?</p> <p>3. In the past 12 months, how many times have you moved?</p> <p>4. In the past 12 months, have you had difficulty (or were unable to) pay for your housing?</p> <p>5. In the past 12 months, have you had to borrow money or ask friends/family or others for money to pay your rent/mortgage payment?</p> <p>6. How likely is it that you will be able to pay for your housing (e.g., rent/mortgage) this month?</p> <p>7. In the past 12 months, has your landlord threatened to evict you?</p> <p>Scoring</p> <ul style="list-style-type: none"> <li>Sum responses into a single scale.</li> <li>Divide at the median.</li> </ul>                                                                                  |

|                                                                                                                                                                                                                                                                                             |                                                                                                                                                                                                                                                                                                                                                                                                                                                                                                                                                                                                       |
|---------------------------------------------------------------------------------------------------------------------------------------------------------------------------------------------------------------------------------------------------------------------------------------------|-------------------------------------------------------------------------------------------------------------------------------------------------------------------------------------------------------------------------------------------------------------------------------------------------------------------------------------------------------------------------------------------------------------------------------------------------------------------------------------------------------------------------------------------------------------------------------------------------------|
| <b>Financial Strain</b>                                                                                                                                                                                                                                                                     |                                                                                                                                                                                                                                                                                                                                                                                                                                                                                                                                                                                                       |
| EHR questions from <sup>5,6</sup>                                                                                                                                                                                                                                                           | Consumer Financial Protection Bureau's Financial Well-Being Scale <sup>7</sup>                                                                                                                                                                                                                                                                                                                                                                                                                                                                                                                        |
| <p>1. How hard is it for you to pay for the very basics like food, housing, medical care, and heating?</p> <p>Scoring</p> <ul style="list-style-type: none"> <li>• "Hard" or "Very hard" is positive.</li> <li>• "Not hard at all", "not very hard", "Somewhat hard is negative.</li> </ul> | <p>1. Because of my money situation, I feel like I will never have the things I want in life.</p> <p>2. I am just getting by financially.</p> <p>3. I am concerned that the money I have or will save won't last.</p> <p>4. I have money left over at the end of the month.</p> <p>5. My finances control my life.</p> <p>Scoring</p> <ul style="list-style-type: none"> <li>• Sum responses into a single scale (accounting for reverse coded).</li> <li>• Covert scale to scores and divide into a binary indicator and divide based on Consumer Financial Protection Bureau guidelines.</li> </ul> |

eReferences

1. Hager ER, Quigg AM, Black MM, et al. Development and validity of a 2-item screen to identify families at risk for food insecurity. *Pediatrics*. 2010;126(1):e26-32. doi:10.1542/peds.2009-3146
2. Economic Research Service, USDA. U.S. Household Food Security Survey Module: Six-Item Short Form. Published 2012. Accessed March 10, 2020. <https://www.ers.usda.gov/media/8282/short2012.pdf>
3. Children's HealthWatch. The Hunger Vital Sign™: Best practices for screening and intervening to alleviate food insecurity. Accessed November 16, 2020. [https://childrenshealthwatch.org/wp-content/uploads/CHW\\_HVS\\_whitepaper\\_FINAL.pdf](https://childrenshealthwatch.org/wp-content/uploads/CHW_HVS_whitepaper_FINAL.pdf)
4. Rollins C, Glass NE, Perrin NA, et al. Housing Instability Is as Strong a Predictor of Poor Health Outcomes as Level of Danger in an Abusive Relationship: Findings From the SHARE Study. *J Interpers Violence*. 2012;27(4):623-643. doi:10.1177/0886260511423241
5. Puterman E, Haritatos J, Adler N, Sidney S, Schwartz JE, Epel E. Indirect effect of financial strain on daily cortisol output through daily negative to positive affect index in the Coronary Artery Risk Development in Young Adults Study. *Psychoneuroendocrinology*. 2013;38(12):10.1016/j.psyneuen.2013.07.016. doi:10/f5rq8t
6. Hall MH, Matthews KA, Kravitz HM, et al. Race and Financial Strain are Independent Correlates of Sleep in Midlife Women: The SWAN Sleep Study. *Sleep*. 2009;32(1):73-82. doi:10.5665/sleep/32.1.73
7. Consumer Financial Protection Bureau. CFPB Financial Well-Being Scale: Scale development technical report. Published 2017. Accessed December 28, 2021. <https://www.consumerfinance.gov/data-research/research-reports/financial-well-being-technical-report/>
