# Supplementary material
Source: PubMed Central journal article supplement (PMC10408256)
Supplement: jama-e2223631-s002.pdf [file jama-e2223631-s002.pdf]

Harle CA, Wu W, Vest JR. Accuracy of electronic health record food insecurity, housing instability, and financial strain screening in adult primary care. *JAMA*. Published February 7, 2023.  
doi:10.1001/jama.2022.23631

### **Data Sharing Statement**

#### **Data**

**Data available:** No
